# Supplementary material for: Medium spiny neurons activity reveals the discrete segregation of mouse dorsal striatum
Source: eLife journal article supplement (doi:10.7554/elife.60580), 2021-02-18
Supplement: supp [file elife-60580-supp-v1.zip]

Archive with 8 entries (8 files):
- elife_poa_e60580_Transparent_Reporting_File.pdf
- elife_poa_e60580_Figure_1_figure_supplement_1.tif
- elife_poa_e60580_Figure_1_figure_supplement_2.tif
- elife_poa_e60580_Figure_2_figure_supplement_1.tif
- elife_poa_e60580_Figure_2_figure_supplement_2.tif
- elife_poa_e60580_Figure_3_figure_supplement_1.tif
- elife_poa_e60580_Figure_7_figure_supplement_1.tif
- elife_poa_e60580_Supplementary_file_1.docx
