# Supplementary material for: Medium spiny neurons activity reveals the discrete segregation of mouse dorsal striatum
Source: eLife journal article supplement (doi:10.7554/elife.60580), 2021-02-18
Supplement: supp [file elife-60580-supp-v1.zip › elife_poa_e60580_Transparent_Reporting_File.pdf]

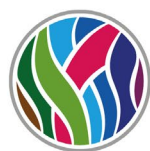

## **eLife's transparent reporting form**

We encourage authors to provide detailed information *within their submission* to facilitate the interpretation and replication of experiments. Authors can upload supporting documentation to indicate the use of appropriate reporting guidelines for health-related research (see [EQUATOR Network](#)), life science research (see the [BioSharing Information Resource](#)), or the [ARRIVE guidelines](#) for reporting work involving animal research. Where applicable, authors should refer to any relevant reporting standards documents in this form.

If you have any questions, please consult our Journal Policies and/or contact us: [editorial@elifesciences.org](mailto:editorial@elifesciences.org).

### **Sample-size estimation**

- You should state whether an appropriate sample size was computed when the study was being designed
- You should state the statistical method of sample size computation and any required assumptions
- If no explicit power analysis was used, you should describe how you decided what sample (replicate) size (number) to use

Please outline where this information can be found within the submission (e.g., sections or figure legends), or explain why this information doesn't apply to your submission:

Sample size for each experiment is indicated in the Methods section. Sample-size calculation was calculated based on previous papers using similar data.

### **Replicates**

- You should report how often each experiment was performed
- You should include a definition of biological versus technical replication
- The data obtained should be provided and sufficient information should be provided to indicate the number of independent biological and/or technical replicates
- If you encountered any outliers, you should describe how these were handled
- Criteria for exclusion/inclusion of data should be clearly stated
- High-throughput sequence data should be uploaded before submission, with a private link for reviewers provided (these are available from both GEO and ArrayExpress)

Please outline where this information can be found within the submission (e.g., sections or figure legends), or explain why this information doesn't apply to your submission:

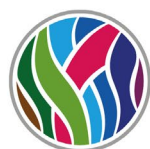

We performed experiments 2 or 3 times per week. All experiments were performed in multiple animals independently, and clearly indicated in the Methods section. When necessary, additional tests were performed to exclude inter-animal bias. Methods section provides details to replicate all performed experiments.

Technical replication (defined as repeated measurements of the same cell) was not performed in this study. Biological replication (defined as measurements of biologically distinct cells that show biological variation) was performed to reach the required sample size.

Neurons having a deviation by more than 10 mV from their initial resting membrane potential were excluded from analysis. This exclusion criterion was pre-established based on previous articles.

### Statistical reporting

- Statistical analysis methods should be described and justified
- Raw data should be presented in figures whenever informative to do so (typically when N per group is less than 10)
- For each experiment, you should identify the statistical tests used, exact values of N, definitions of center, methods of multiple test correction, and dispersion and precision measures (e.g., mean, median, SD, SEM, confidence intervals; and, for the major substantive results, a measure of effect size (e.g., Pearson's *r*, Cohen's *d*)
- Report exact p-values wherever possible alongside the summary statistics and 95% confidence intervals. These should be reported for all key questions and not only when the p-value is less than 0.05.

Please outline where this information can be found within the submission (e.g., sections or figure legends), or explain why this information doesn't apply to your submission:

The statistical tests used, and the information displayed in the error bars of the figures are described at the end of Methods section. In each experiment, the sample size is stated in the corresponding subsection of the Results section. All p values are indicated in the figures.

(For large datasets, or papers with a very large number of statistical tests, you may upload a single table file with tests, Ns, etc., with reference to sections in the manuscript.)

### Group allocation

- Indicate how samples were allocated into experimental groups (in the case of clinical studies, please specify allocation to treatment method); if randomization was used, please also state if restricted randomization was applied
- Indicate if masking was used during group allocation, data collection and/or data analysis

Please outline where this information can be found within the submission (e.g., sections or figure legends), or explain why this information doesn't apply to your submission:

Subjects were randomly assigned to experimental groups. In all conducted experiments groups of animals from different litters were used.

*In vivo* patch-clamp recordings is a blind technique, it is not possible to know which type of neuron will be recorded before being recorded. No other measure that could be affected by the absence of masking (i.e. behavioral quantification, cell counting) was done in this paper.

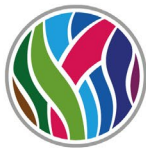

**Additional data files (“source data”)**

- We encourage you to upload relevant additional data files, such as numerical data that are represented as a graph in a figure, or as a summary table
- Where provided, these should be in the most useful format, and they can be uploaded as “Source data” files linked to a main figure or table
- Include model definition files including the full list of parameters used
- Include code used for data analysis (e.g., R, MatLab)
- Avoid stating that data files are “available upon request”

Please indicate the figures or tables for which source data files have been provided:

All data generated during and/or analysed during the current study, as well as the required code to reproduce the figures, will be uploaded to a public repository prior to be published.
